# Supplementary material for: Enhancement of Neuroglial Extracellular Matrix Formation and Physiological Activity of Dopaminergic Neural Cocultures by Macromolecular Crowding
Source: Preprints.org preprint supplement (doi:10.20944/preprints202205.0256.v1), 2022-05-19
Supplement: Supplementary file 1 [file supplementary]

### Supplementary figure 1:

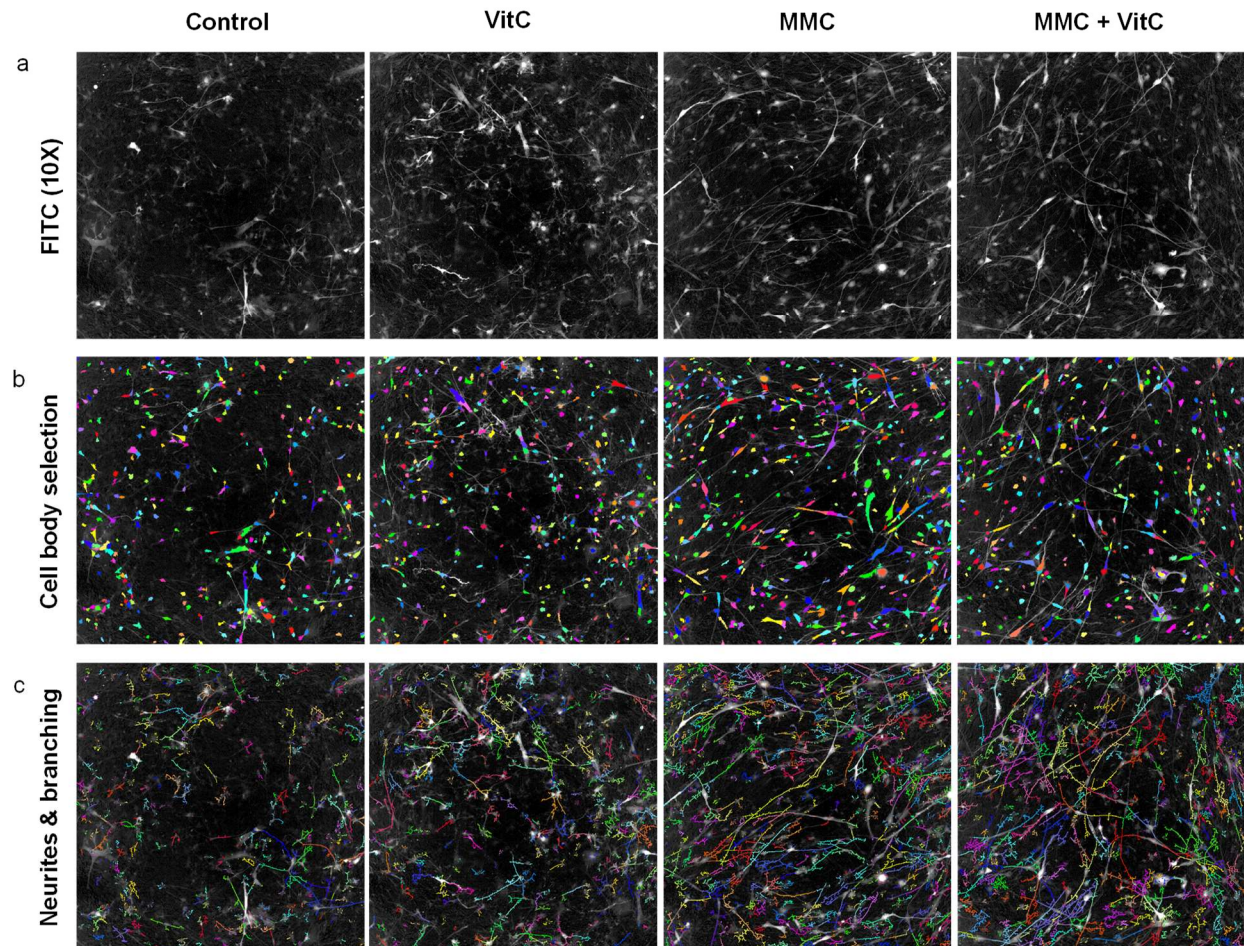

**Image analysis for neurite extension and branching.** (a) Representative images of GCaMP6f transfected cells from i) Control, ii) VitC, iii) MMC, iv) MMC+VitC groups taken under 10X water immersion confocal objective using FITC filter for neuronal morphology analysis. (b) The 'find cell' algorithmic script for image analysis in Columbus software (PerkinElmer) providing ROI of  $\geq 20\mu\text{m}^2$  used to locate the neuronal cell body from each group. (c) CSIRO Neurites Analysis 2 method was applied to mark the length along with segment/branches of neurites originated from those preselected cell bodies. Scale bar:  $50\mu\text{m}$ .

## Supplementary figure 2:

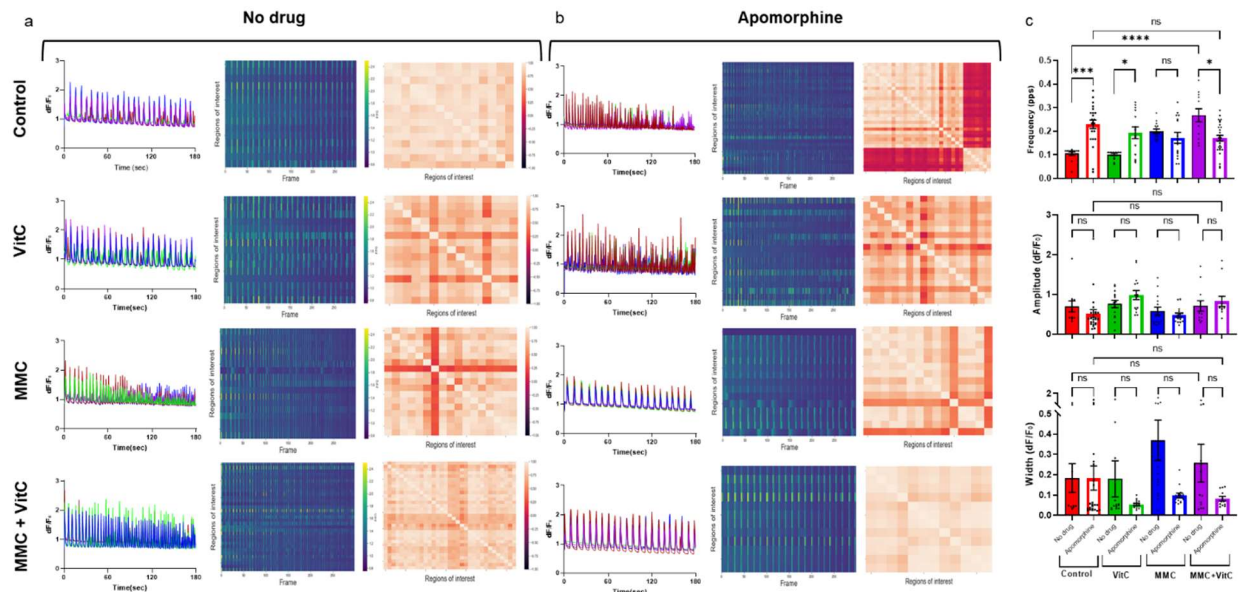

**Effect of D2 receptor agonist (Apomorphine) on single neuronal calcium dynamics of iDopas+iAstros co-cultures under MMC treatment.** (a) Analysis of basal single cell fluorescence calcium fluxes between MMC treatment groups, including example traces of calcium activity over time, activity combined heat map of over 30 neurons over time, and correlation heat map within cells. (b) Same as (a) after the Apomorphine treatment. (c) Quantitative calcium peak properties, peak frequency, peak amplitude, and peak width regulated with MMC treatment before and after Apomorphine treatment, along with the correlation score plot. Error bar: standard error of mean from 9 wells (n=3 wells/group, 3 biological replicates); Statistical significance: Two-way ANOVA, \*p<0.05, \*\*p<0.01, \*\*\*p<0.001, \*\*\*\*p<0.0001, n.s.=not significant.

**Supplementary figure 3:**

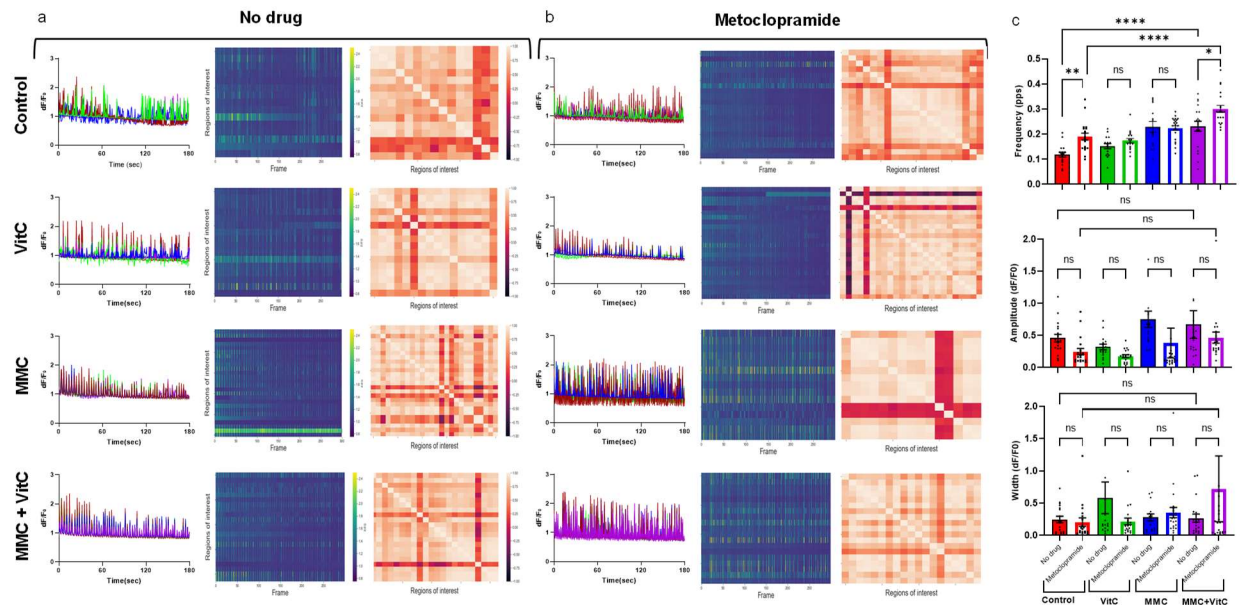

**Effect of D2 receptor antagonist (Metoclopramide) on single neuronal calcium dynamics of iDopas+iAstros co-cultures under MMC treatment.** (a) Analysis of basal single cell fluorescence calcium fluxes between MMC treatment groups, including example traces of calcium activity over time, activity combined heat map of over 30 neurons over time, and correlation heat map within cells. (b) Same as (a) after the Metoclopramide treatment. (c) Quantitative calcium peak properties, peak frequency, peak amplitude, and peak width regulated with MMC treatment before and after Metoclopramide treatment, along with the correlation score plot. Error bar: standard error of mean from 9 wells (n=3 wells/group, 3 biological replicates); Statistical significance: Two-way ANOVA, \* $p < 0.05$ , \*\* $p < 0.01$ , \*\*\* $p < 0.001$ , \*\*\*\* $p < 0.0001$ , n.s.=not significant.



## Supplementary figure 4:

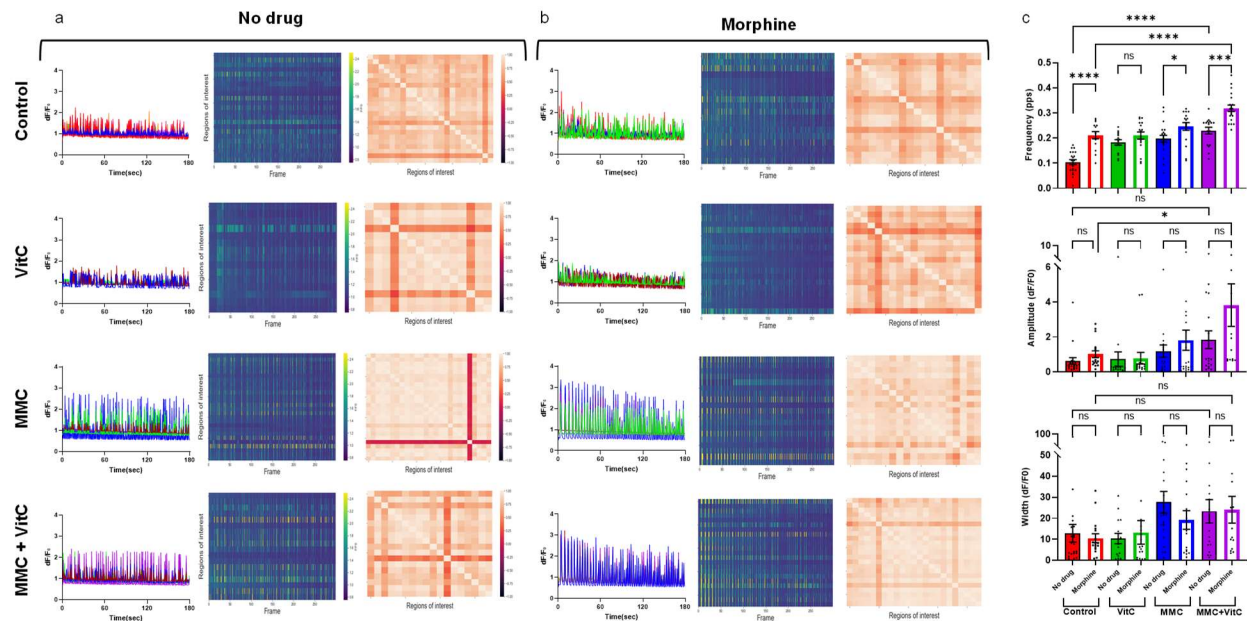

**Effect of  $\mu$ -opioid receptor agonist (Morphine) on single neuronal calcium dynamics of iDopas+iAstros co-cultures under MMC treatment.** (a) Analysis of basal single cell fluorescence calcium fluxes between MMC treatment groups, including example traces of calcium activity over time, activity combined heat map of over 30 neurons over time, and correlation heat map within cells. (b) Same as (a) after the Morphine treatment. (c) Quantitative calcium peak properties, peak frequency, peak amplitude, and peak width regulated with MMC treatment before and after Morphine treatment, along with the correlation score plot. Error bar: standard error of mean from 9 wells ( $n=3$  wells/group, 3 biological replicates); Statistical significance: Two-way ANOVA, \* $p<0.05$ , \*\* $p<0.01$ , \*\*\* $p<0.001$ , \*\*\*\* $p<0.0001$ , n.s.=not significant.

**Table 1. Primary and secondary antibodies and dilutions**

| <b>Antibody Target<br/>(Clone)</b>            | <b>Host &amp;<br/>Clonality</b> | <b>Manufacturer &amp;<br/>Catalog no.</b> | <b>Dilution</b> |
|-----------------------------------------------|---------------------------------|-------------------------------------------|-----------------|
| Collagen IV                                   | Mouse<br>monoclonal             | Dako, M0785                               | 1:200           |
| Fibronectin                                   | Rabbit<br>polyclonal            | Abcam, ab2413                             | 1:200           |
| GFAP                                          | Rabbit<br>polyclonal            | Dako, Z0334                               | 1:1000          |
| Laminin (alpha1)                              | Rabbit<br>polyclonal            | Dako, Z0097                               | 1:200           |
| Microtubule-<br>associated protein<br>(MAP) 2 | Mouse<br>monoclonal             | Sigma, M4403                              | 1:200           |
| Tyrosine hydroxylase<br>(TH)                  | Rabbit<br>polyclonal            | EMD Millipore, AB152                      | 1:1000          |
| Goat anti-mouse 555<br>(secondary)            |                                 | ThermoFisher,<br>A28180                   | <i>1:500</i>    |
| Goat anti-rabbit 647<br>(secondary)           |                                 | ThermoFisher,<br>A27040                   | <i>1:500</i>    |
| Goat anti-chicken<br>488 (secondary)          |                                 | Invitrogen, A32931                        | <i>1:500</i>    |
